# Supplementary material
Source: HighWire-hosted journal article supplement (https://bmjopen.bmj.com/content/9/8/e028858)
Supplement: inline-supplementary-material-3 [file inline-supplementary-material-3.pdf]

### **Appendix 3. Informed consent form for patients after emergency AAA repair.**

#### **Biobank Pearl AAA**

- I consent to the collection, storage and analysis of blood, urine and aortic tissue (in case of open surgery) and data regarding research for abdominal aortic aneurysms.
  - I consent to the coded storage of my data for a maximum of 50 years in the biobank Pearl AAA.
  - I consent to the coded storage of my biomaterials for a maximum of 50 years for use in future biomedical research.
  - I give permission that my GP to be informed that I am participating in this study.
  - I give permission for information regarding my health status to be requested from my GP, pharmacy and the municipal registry of persons, under the condition that my privacy will be safeguarded.
  - During biomedical research with my biomaterials, incidental findings may be found that are associated with a disease or disorder. Sometimes it only concerns an increased risk. I consent that I will be informed about incidental findings if these are relevant to my (or my family's) health status because either prevention or treatment is possible.
  - I consent to the possible sharing of my data, biomaterials and imaging data with non-commercial institutions in countries in the European Union. This will only be done for research purposes.
- 
- I consent to the acquisition of my data from national registries concerning the quality of healthcare and its improvement, under the condition that my privacy will be safeguarded.
    - Yes
    - No
  - In the event of my death, I consent to the possibility that information regarding my death may be acquired from the Central Bureau of Statistics, under the condition that my privacy will be safeguarded.
    - Yes
    - No
  - I consent to the possible sharing of my data, biomaterials and imaging data with institutions in countries outside the European Union. This will only be done for research purposes.
    - Yes
    - No
  - I consent to the possible sharing of my data, biomaterials and imaging data with commercial entities. This will only be done for research purposes.
    - Yes
    - No

- I consent to the study of my DNA for findings associated with the origin and development of abdominal aortic aneurysms and to the effects and complications of medication
  - ☐ Yes
  - ☐ No
  
- I consent that I may be approached for additional information and/or biomaterials if this is necessary for a specific biomedical study
  - ☐ Yes
  - ☐ No

**Name participant:**

Date of birth:

Signature:

Date: \_\_/\_\_/\_\_

---

**Declaration of researcher**

I hereby declare that I have fully informed the legal representative regarding the biobank Pearl AAA. If information comes to light during the course of the study that could affect the legal representative's consent, I will inform him/her of this in a timely fashion.

**Name researcher:**

Signature:

Date: \_\_/\_\_/\_\_

---

Additional information has been given by (if applicable):

Name:

Role:

Signature:

Date: \_\_/\_\_/\_\_

*Study participants receive the full information brochure, and a signed copy of the informed consent form.*
