# Supplementary material
Source: HighWire-hosted journal article supplement (https://bmjopen.bmj.com/content/9/8/e028858)
Supplement: inline-supplementary-material-6 [file inline-supplementary-material-6.pdf]

## Appendix 6. Informed consent form for legal representative.

### PARIS study

I have been asked to give written consent for the participation of the following person in the PARIS study.

Name person:

Date of birth: \_\_/\_\_/\_\_

- I have read the subject information form. I was also able to ask questions. My questions have been answered to my satisfaction. I had enough time to decide whether this person participates.
- I know that participation is voluntary. I know that I may decide at any time that this person does not to participate after all or to withdraw him/her from the study. I do not need to give a reason for this.
- I give permission for the GP of this person to be informed that he/she is participating in this study.
- I give permission for information to be requested from the GP or pharmacy of this person regarding his/her health status.
- I know that some people may have access to all this person's data to verify the study. These people are listed in this information sheet. I consent to the inspection by them.
- I consent to the collection and use of the data, biomaterials and imaging data as has been specified in this information sheet.
- I consent to the storage of the data for the PARIS study for a maximum of 50 years in the biobank Pearl AAA.
- I consent to the possible sharing of the data, biomaterials and imaging data with non-commercial institutions in countries in the European Union. This will only be for the PARIS study if necessary.

- 
- I consent to the possible sharing of the data, biomaterials and imaging data with institutions in countries outside the European Union. This will only be done for the PARIS study.
    - Yes
    - No
  - I consent to the possible sharing of the data, biomaterials and imaging data with commercial entities. This will only be done for the PARIS study.
    - Yes
    - No
  - I agree with the participation of this person with the study.

**Name legal representative:**

Date of birth:

Relation to the person:

Signature:

Date: \_\_/\_\_/\_\_

---

**Declaration of researcher**

I hereby declare that I have fully informed the legal representative regarding the biobank Pearl AAA. If information comes to light during the course of the study that could affect the legal representative's consent, I will inform him/her of this in a timely fashion.

**Name researcher:**

Signature:

Date: \_\_/\_\_/\_\_

---

Additional information has been given by (if applicable):

Name:

Role:

Signature:

Date: \_\_/\_\_/\_\_

*Study participants receive the full information brochure, and a signed copy of the informed consent form.*
